# Supplementary material for: Cesium iodide post-treatment of organic–inorganic perovskite crystals to improve photovoltaic performance and thermal stability
Source: Royal Society of Chemistry journal article supplement (doi:10.1039/d0nr05435f), 2020-01-01
Supplement: d0nr05435f1.pdf [file d0nr05435f1.pdf]

**Electronic Supplementary Information**

Cesium iodide post-treatment of organic-inorganic perovskite crystals to improve photovoltaic performance and thermal stability

Atsushi Kogo\* and Masayuki Chikamatsu

National Institute of Advanced Industrial Science and Technology (AIST),

1-1-1 Higashi, Tsukuba, Ibaraki 305-8565, Japan

kogo.atsushi@aist.go.jp

## Experimental Details

TiO<sub>2</sub> compact layers (~50 nm thick) were formed on F-doped tin oxide (FTO) substrates heated by spray pyrolysis at 400 °C, using a precursor solution of titanium diisopropoxide bis(acetylacetonate) (75 wt% in isopropanol, Sigma-Aldrich) diluted with ethanol (7.5 vol%). Mesoporous TiO<sub>2</sub> layers were formed by spin-coating a commercial TiO<sub>2</sub> paste (18NR, JGC Catalysts and Chemicals Ltd.) diluted with ethanol (12.5 wt%) on the substrates at 2000 rpm for 30 s and sintering at 500 °C for 30 min.

Cs<sub>0.05</sub>(FA<sub>0.83</sub>MA<sub>0.17</sub>)<sub>0.95</sub>Pb(I<sub>0.83</sub>Br<sub>0.17</sub>)<sub>3</sub> perovskite layers (FA = CH(NH<sub>2</sub>)<sub>2</sub>, MA = CH<sub>3</sub>NH<sub>3</sub>) were formed under a N<sub>2</sub> atmosphere according to the literature.<sup>1</sup> FAI (1 M), MABr (0.2 M), PbI<sub>2</sub> (1.1 M), and PbBr<sub>2</sub> (0.2 M) were dissolved in a mixed solvent of *N,N*-dimethylformamide and dimethyl sulfoxide (DMSO) (volume ratio = 4:1). 4 vol% of 1.5 M CsI in DMSO was then added to the solution. The precursor solution was spin-coated on the substrates through a two-step program of 1000 and 4000 rpm for 10 and 30 s. Chlorobenzene was dropped on the substrate 20 s prior to the end of the spin-coating to induce crystallization of the perovskite. The substrates were finally annealed at 105 °C for 1 h. As the post-treatment, anhydrous methanol solutions containing CsI or anhydrous 2-propanol solutions containing MAI or FAI (30 mM) were spin-coated at 5000 rpm for 30 s on the perovskite substrates, followed by annealing at 105 °C for 5 min.

To form hole-transport layers, a chlorobenzene solution containing 2,2,7,7-tetrakis(*N,N*-di-*p*-methoxyphenylamine)-9,9-spirobifluorene (70 mM), bis(trifluoromethane) sulfonamide lithium salt (35 mM), 4-*tert*-butylpyridine (0.23 M), and tris(2-(1H-pyrazol-1-yl)-4-*tert*butylpyridine)-cobalt(III) tris(bis(trifluoromethylsulfonyl)imide) (4.2 mM) was spin-coated on the perovskite substrates at 3000 rpm for 30 s and dried overnight in dry air (dew point  $\sim -20$  °C).

To form solar cells, Au contacts were formed by vapor deposition (3 mm  $\times$  3 mm). Photocurrent density-voltage (*J-V*) curves were measured with a source meter (R6243, Advantest, scan speed = 0.1 V s<sup>-1</sup>, dwell time = 0.1 s) and solar simulator (WXS-80C-3, WACOM), using a black mask (aperture area = 0.09 cm<sup>2</sup>). A reference crystalline Si cell (J-NIMC01, calibrated and certified by Japan Quality Assurance Organization) was used to correct the incident intensity (AM 1.5 G, 100 mW cm<sup>-2</sup>). The external quantum efficiency (EQE) action spectrum was measured with action spectrum measurement equipment (CEP-99W, Bunkou Keiki).

UV-Vis spectroscopy (V-770, Jasco), X-ray diffraction (XRD, Smartlab, Rigaku) with a CuK $\alpha$  radiation source, scanning electron microscopy (SEM, S4800, Hitachi), photoluminescence spectrometry (C12132, Hamamatsu) and secondary ion mass spectrometry (ADEPT 1010, Physical Electronics) were used for characterization of the

perovskite materials.

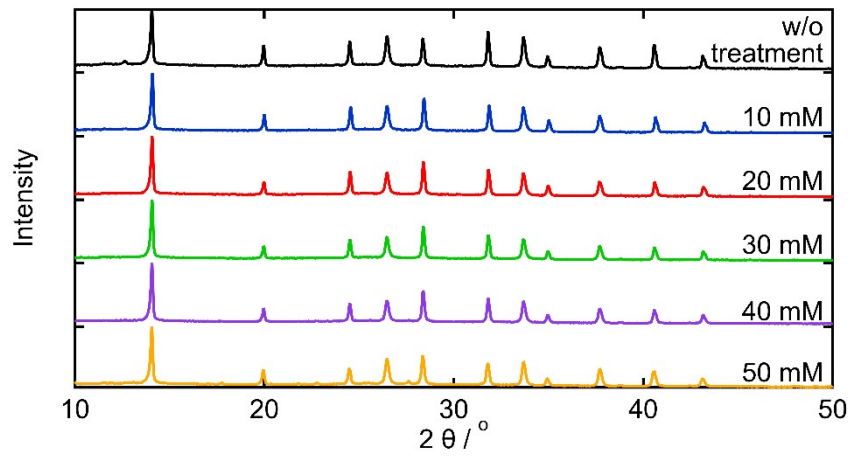

**Figure S1.** XRD patterns for FTO/TiO<sub>2</sub>/perovskite substrates with and without CsI treatment of different concentration.

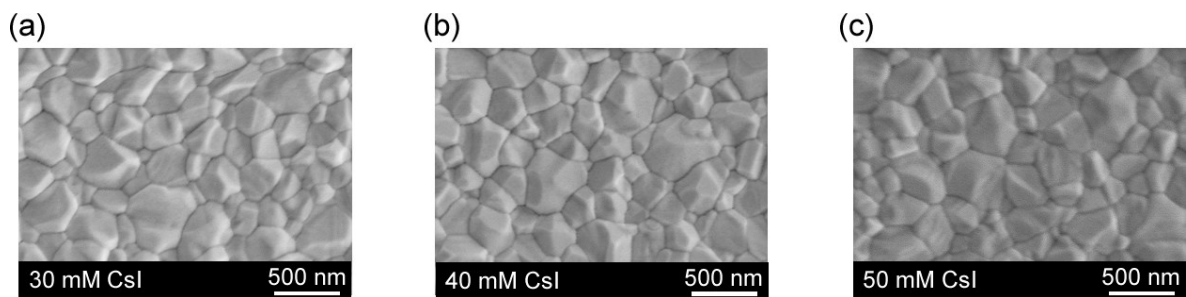

**Figure S2.** Surface SEM images of FTO/TiO<sub>2</sub>/perovskite substrates treated with (a) 30 mM, (b) 40 mM, and (c) 50 mM CsI solution.

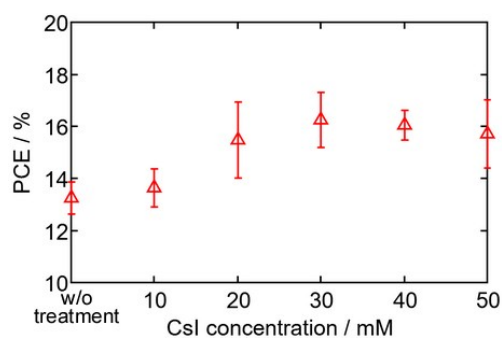

**Figure S3.** Dependence of CsI concentration on the PCE of the solar cells estimated from  $J$ - $V$  curves measured under forward ( $-0.2$  V  $\rightarrow$  1.3 V) voltage scanning.

**Table S1.** Solar cell parameters for perovskite solar cells with and without CsI treatment estimated from  $J$ - $V$  curves measured under forward ( $-0.2$  V  $\rightarrow$  1.3 V) voltage scanning.

Data were collected for no less than 30 cells.

| treatment     | $J_{SC}$ / mA cm <sup>-2</sup> | $V_{OC}$ / V  | FF            | PCE / %      |
|---------------|--------------------------------|---------------|---------------|--------------|
| w/o treatment | 20.85 ± 0.44                   | 1.051 ± 0.020 | 0.605 ± 0.027 | 13.25 ± 0.62 |
| 10 mM CsI     | 21.15 ± 0.29                   | 1.051 ± 0.014 | 0.613 ± 0.022 | 13.64 ± 0.73 |
| 20 mM CsI     | 21.08 ± 0.51                   | 1.066 ± 0.018 | 0.688 ± 0.045 | 15.49 ± 1.47 |
| 30 mM CsI     | 21.09 ± 0.41                   | 1.071 ± 0.029 | 0.720 ± 0.034 | 16.27 ± 1.07 |
| 40 mM CsI     | 21.09 ± 0.43                   | 1.070 ± 0.040 | 0.712 ± 0.013 | 16.06 ± 0.57 |
| 50 mM CsI     | 20.73 ± 0.38                   | 1.091 ± 0.049 | 0.694 ± 0.027 | 15.71 ± 1.32 |

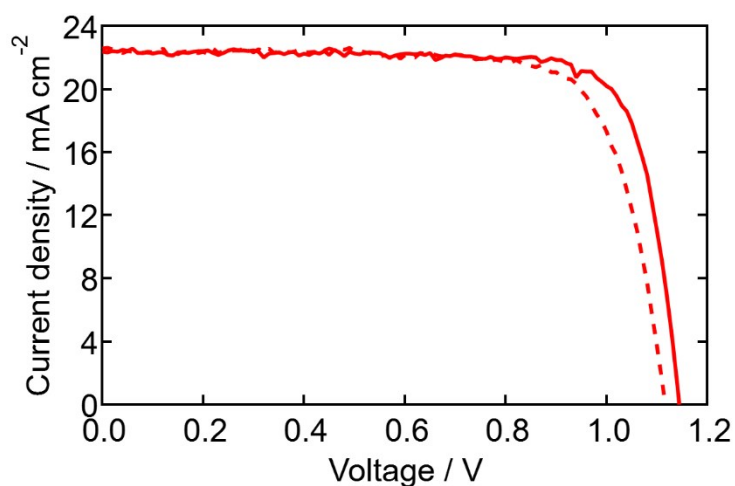

**Figure S4.**  $J$ - $V$  curve for the best-performing solar cells with 20-mM CsI treatment, using an anti-reflection film (MOSMITE, Mitsubishi Chemical) on the glass side. Forward ( $-0.2\text{ V} \rightarrow 1.3\text{ V}$ ) and backward ( $1.3\text{ V} \rightarrow -0.2\text{ V}$ ) voltage scans are indicated as dashed and solid lines, respectively.

**Table S2.** Solar cell parameters for the best-performing solar cells with 20-mM CsI treatment, using an anti-reflection film (MOSMITE, Mitsubishi Chemical) on the glass side.

| Scan     | $J_{sc}$<br>/ $\text{mA cm}^{-2}$ | $V_{oc}$<br>/ V | FF    | PCE<br>/ % |
|----------|-----------------------------------|-----------------|-------|------------|
| Forward  | 22.58                             | 1.116           | 0.762 | 19.20      |
| Backward | 22.36                             | 1.144           | 0.801 | 20.48      |

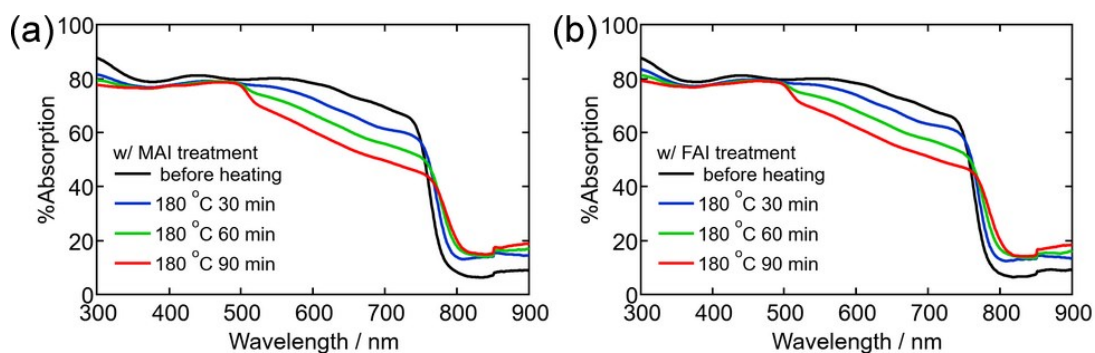

**Figure S5** Absorption spectra of 30-mM (a) MAI and (b) FAI-treated FTO/TiO<sub>2</sub>/perovskite substrates before and after heating at 180 °C in N<sub>2</sub> atmosphere.

## REFERENCE

1. Saliba, M.; Matsui, T.; Seo, J.-Y.; Domanski, K.; Correa-Baena, J.-P.; Nazeeruddin, M. K.; Zakeeruddin, S. M.; Tress, W.; Abate, A.; Hagfeldt, A.; Grätzel, M. Cesium-Containing Triple Cation Perovskite Solar Cells: Improved Stability, Reproducibility and High Efficiency. *Energy Environ. Sci.* **2016**, *9*, 1989–1997.
